# Supplementary material
Source: publisher figshare collection journal article supplement (https://sage.figshare.com/ndownloader/files/14153057)
Supplement: Supplementary file 1 [file 14153057]

## Self-Reported vs. Digitally Recorded: Measuring Political Activity on Facebook

### Online Appendix

Table A1: Correlations, measures of Facebook activity frequency

|                                                 | 1   | 2   | 3   | 4   | 5   |
|-------------------------------------------------|-----|-----|-----|-----|-----|
| 1. Status frequency (SR)                        |     |     |     |     |     |
| 2. Status frequency, overall (DTD)              | .62 |     |     |     |     |
| 3. Status frequency, most recent month (DTD)    | .59 | .91 |     |     |     |
| 4. News link frequency (SR)                     | .68 | .52 | .52 |     |     |
| 5. News link frequency, overall (DTD)           | .42 | .65 | .63 | .51 |     |
| 6. News link frequency, most recent month (DTD) | .33 | .50 | .56 | .43 | .77 |

Table A2: Correlations, measures of Facebook binary activities

|                                   | 1   | 2   | 3   | 4   | 5   |
|-----------------------------------|-----|-----|-----|-----|-----|
| 1. Like any political pages (SR)  |     |     |     |     |     |
| 2. Like any political pages (DTD) | .38 |     |     |     |     |
| 3. Share any news (SR)            | .18 | .20 |     |     |     |
| 4. Share any news (DTD)           | .18 | .38 | .40 |     |     |
| 5. Share pol. page post (SR)      | .50 | .30 | .31 | .27 |     |
| 6. Share pol page post (DTD)      | .24 | .34 | .27 | .44 | .36 |
